# Supplementary material for: Bedside and laboratory diagnostic testing in myasthenia
Source: PubMed Central journal article supplement (PMC9119875; doi:10.1007/s00415-022-10986-3), 2022-02-10
Supplement: 415_2022_10986_MOESM1_ESM.pdf [file 415_2022_10986_MOESM1_ESM.pdf]

### Supplementary Table 1

Genetic testing for congenital myasthenic syndromes will involve one or more of these genes tested individually, sequentially or using panel testing.

| <b>Name/Gene ID</b> | <b>Description</b>                             | <b>Location</b> | <b>Aliases</b>                                                | <b>OMIM</b> |
|---------------------|------------------------------------------------|-----------------|---------------------------------------------------------------|-------------|
| <i>CHRNE</i>        | cholinergic receptor nicotinic epsilon subunit | Chromosome 17   | ACHRE, CMS1D, CMS1E, CMS2A, CMS4A, CMS4B, CMS4C, FCCMS, SCCMS | 100725      |
| <i>CHRNA1</i>       | cholinergic receptor nicotinic alpha 1 subunit | Chromosome 2    | ACHRA, ACHRD, CHRNA, CMS1A, CMS1B, CMS2A, FCCMS, SCCMS        | 100690      |
| <i>CHRND</i>        | cholinergic receptor nicotinic delta subunit   | Chromosome 2    | ACHRD, CMS2A, CMS3A, CMS3B, CMS3C, FCCMS, SCCMS               | 100720      |
| <i>GFPT1</i>        | glutamine-fructose-6-phosphate transaminase 1  | Chromosome 2    | CMS12, CMSTA1, GFA, GFAT,                                     | 138292      |

|               |                                               |               |                                                          |        |
|---------------|-----------------------------------------------|---------------|----------------------------------------------------------|--------|
|               |                                               |               | GFAT 1,<br>GFAT1,<br>GFAT1m,<br>GFPTL,<br>MSLG,<br>GFPT1 |        |
| <i>CHRNBI</i> | cholinergic receptor nicotinic beta 1 subunit | Chromosome 17 | ACHRB,<br>CHRNB,<br>CMS1D,<br>CMS2A,<br>CMS2C,<br>SCCMS  | 100710 |
| <i>MUSK</i>   | muscle associated receptor tyrosine kinase    | Chromosome 9  | CMS9, FADS,<br>FADS1                                     | 601296 |
| <i>DOK7</i>   | docking protein 7                             | Chromosome 4  | C4orf25,<br>CMS10,<br>CMS1B,<br>FADS3                    | 610285 |
| <i>RAPSN</i>  | receptor associated protein of the synapse    | Chromosome 11 | CMS11,<br>CMS4C,<br>FADS,<br>FADS2,<br>RAPSYN,<br>RNF205 | 601592 |
| <i>CHAT</i>   | choline O-acetyltransferase                   | Chromosome 10 | CHOACTASE,<br>CMS1A,<br>CMS1A2,<br>CMS6                  | 118490 |
| <i>AGRN</i>   | agrin                                         | Chromosome 1  | AGRIN,<br>CMS8,<br>CMSPPD                                | 103320 |

|                |                                                                   |                  |                                                                                                                     |        |
|----------------|-------------------------------------------------------------------|------------------|---------------------------------------------------------------------------------------------------------------------|--------|
| <i>LRP4</i>    | LDL receptor related protein 4                                    | Chromosome<br>11 | CLSS,<br>CMS17, LRP-<br>4, LRP10,<br>MEGF7,<br>SOST2                                                                | 604270 |
| <i>COLQ</i>    | collagen like tail subunit of<br>asymmetric acetylcholinesterase  | Chromosome<br>3  | CMS5, EAD                                                                                                           | 603033 |
| <i>CHRNG</i>   | cholinergic receptor nicotinic gamma<br>subunit                   | Chromosome<br>2  | ACHRG                                                                                                               | 100730 |
| <i>AGER</i>    | advanced glycosylation end-product<br>specific receptor           | Chromosome<br>6  | RAGE,<br>SCARJ1                                                                                                     | 60021  |
| <i>ALG2</i>    | alpha-1,3/1,6-mannosyltransferase                                 | Chromosome<br>9  | CDG1I,<br>CDGII,<br>CMS14,<br>CMSTA3,<br>NET38,<br>hALPG2                                                           | 607905 |
| <i>ALG14</i>   | UDP-N-acetylglucosaminyltransferase<br>subunit                    | Chromosome<br>1  | CMS15                                                                                                               | 612866 |
| <i>COL13A1</i> | collagen type XIII alpha 1 chain                                  | Chromosome<br>10 | CMS19,<br>COLXIII A1                                                                                                | 120350 |
| <i>DPAGT1</i>  | dolichyl-phosphate N-<br>acetylglucosaminophosphotransferase<br>1 | Chromosome<br>11 | ALG7, CDG-<br>Ij, CDG1J,<br>CMS13,<br>CMSTA2,<br>D11S366,<br>DGPT,<br>DPAGT,<br>DPAGT2,<br>G1PT, GPT,<br>UAGT, UGAT | 191350 |

|               |                                              |               |                                                                                        |        |
|---------------|----------------------------------------------|---------------|----------------------------------------------------------------------------------------|--------|
| <i>GMPPB</i>  | GDP-mannose pyrophosphorylase B              | Chromosome 3  | LGMDR19, MDDGA14, MDDGB14, MDDGC14                                                     | 615320 |
| <i>LAMA5</i>  | laminin subunit alpha 5                      | Chromosome 20 |                                                                                        | 601033 |
| <i>LAMB2</i>  | laminin subunit beta 2                       | Chromosome 3  | LAMS, NPHS5                                                                            | 150325 |
| <i>UNC13A</i> | unc-13 homolog A                             | Chromosome 19 | Munc13-1                                                                               | 609894 |
| <i>MYO9A</i>  | myosin IXA                                   | Chromosome 15 | CMS24                                                                                  | 604875 |
| <i>PLEC</i>   | plectin                                      | Chromosome 8  | EBS1, EBSMD, EBSND, EBSO, EBSOG, EBSPA, HD1, LGMD2Q, LGMDR17, PCN1, PLEC1b, PLTN, PLEC | 601282 |
| <i>PKNOX1</i> | PBX/knotted 1 homeobox 1                     | Chromosome 21 | PREP1, pkonx1c                                                                         | 602100 |
| <i>SCN4A</i>  | sodium voltage-gated channel alpha subunit 4 | Chromosome 17 | CMS16, HOKPP2, HYKPP, HYPP, NAC1A, Na(V)1.4, Nav1.4, SkM1                              | 603967 |

|                |                                       |               |                                                                      |        |
|----------------|---------------------------------------|---------------|----------------------------------------------------------------------|--------|
| <i>SLC18A3</i> | solute carrier family 18 member A3    | Chromosome 10 | CMS21, VACHT                                                         | 600336 |
| <i>SLC25A1</i> | solute carrier family 25 member 1     | Chromosome 22 | CMS23, CTP, D2L2AD, SEA, SLC20A3                                     | 190315 |
| <i>SLC5A7</i>  | solute carrier family 5 member 7      | Chromosome 2  | CHT, CHT1, CMS20, HMN7A                                              | 608761 |
| <i>SNAP25</i>  | synaptosome associated protein 25     | Chromosome 20 | CMS18, RIC-4, RIC4, SEC9, SNAP, SNAP-25, SUP, bA416N4.2, dJ1068F16.2 | 600322 |
| <i>VAMP1</i>   | vesicle associated membrane protein 1 | Chromosome 12 | CMS25, SPAX1, SYB1, VAMP-1                                           | 185880 |
| <i>SYT2</i>    | synaptotagmin 2                       | Chromosome 1  | CMS7, MYSPC, SytII                                                   | 600104 |

OMIM= online Mendelian inheritance in man database number
